# Supplementary material
Source: PubMed Central journal article supplement (PMC5373883)

1181 **Supplemental Materials:**  
1182 Supplemental Figures 1-7  
1183 Supplemental Table 1  
1184 Supplemental Movies 1-10  
1185  
1186

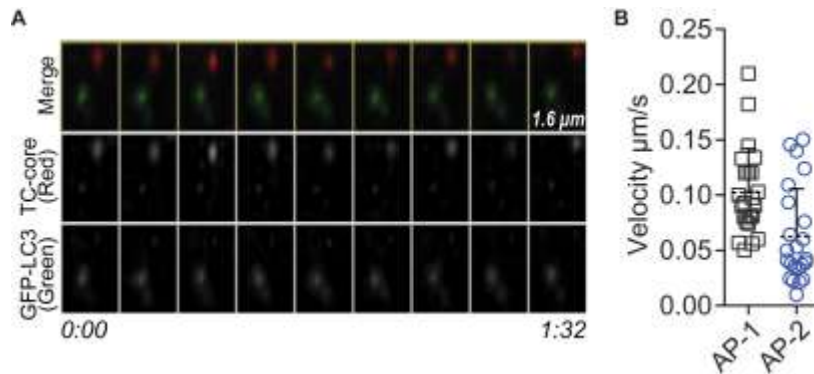

1187  
1188  
1189 **Supplemental figure 1. Co-trafficking of HCV particles with host proteins. (A)**  
1190 Representative montages from live cell fluorescence microscopy of TC-core HCV particles co-  
1191 trafficking with GFP-LC3. **(B)** Velocity of individual TC-core puncta co-trafficking with AP1 or  
1192 AP2. Experiments were replicated twice.

1193  
1194  
1195  
1196  
1197  
1198  
1199  
1200  
1201

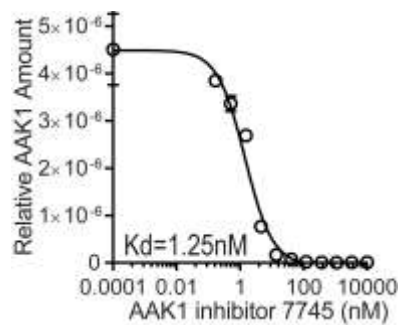

1202  
1203  
1204 **Supplemental figure 2. 7745 Kd.** Kd of compound 7745 for AAK1 as measured by a  
1205 KINOMEscan kinase assay (DiscoverX).

1206

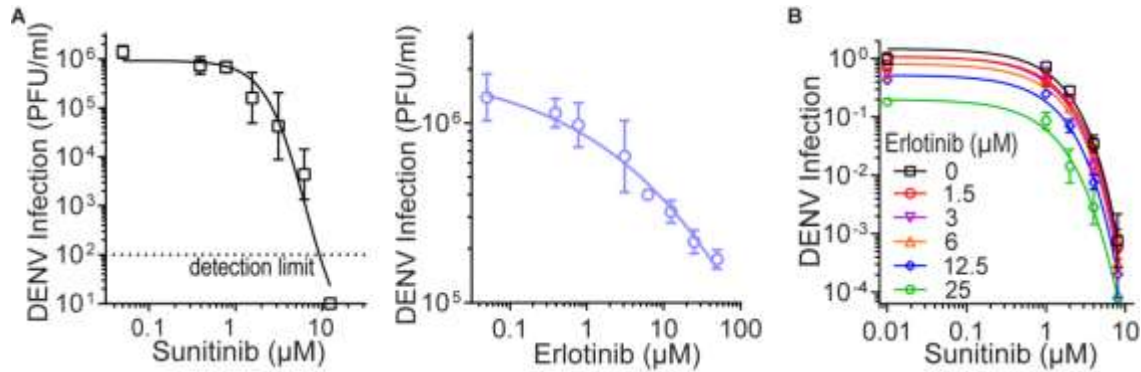

1207  
1208  
1209  
1210  
1211  
1212  
1213  
1214  
1215  
1216  
1217  
1218  
1219  
1220

**Supplemental figure 3. Dose response of DENV infection to sunitinib and erlotinib. (A)** Dose response of overall DENV infection to sunitinib and erlotinib measured by plaque assays at 72 hours post-infection. Assay detection limit is marked with a dotted line. **(B)** Dose response of overall DENV infection to sunitinib/erlotinib combinations measured by luciferase assays at 48 hours post-infection and normalized to DMSO control. All data shown are representative of at least two experiments with 6 biological replicates each. Shown are mean +/- s.d. PFU, plaque forming units.

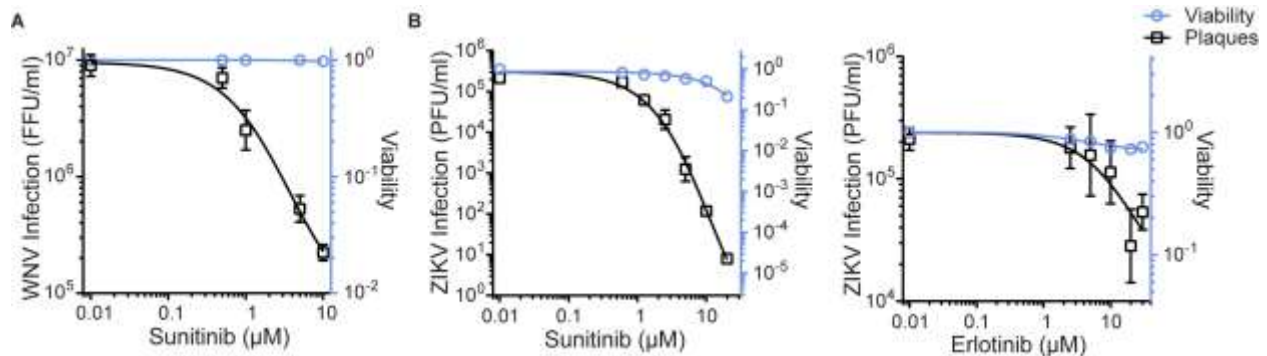

1221  
1222  
1223  
1224  
1225  
1226  
1227  
1228  
1229  
1230

**Supplemental figure 4. Activity of sunitinib and erlotinib against additional flaviviruses. (A)** Overall infection of murine embryonic fibroblast cells with WNV (black) and relative cell viability (blue) following 24 hour treatment with sunitinib measured by focus formation and MTT assays, respectively. **(B)** Overall infection of Huh7 cells with ZIKV (black) and relative cell viability (blue) following 48 hour treatment with sunitinib and erlotinib measured by plaque and alamarBlue assays, respectively. Shown are representative experiments from at least two conducted with 2 (panel A) and 6 (panel B) biological replicates each.

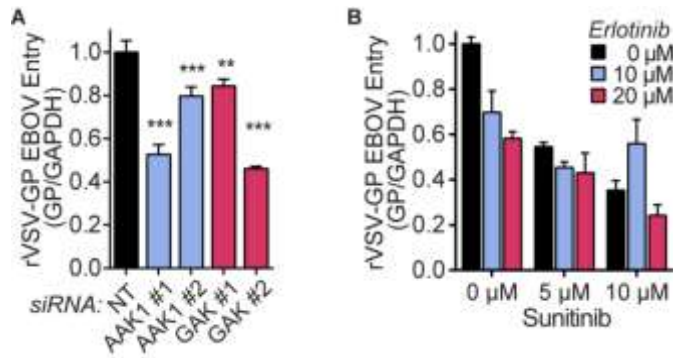

1231  
1232  
1233  
1234  
1235  
1236  
1237  
1238  
1239  
1240  
1241

**Supplemental figure 5. Regulation of EBOV entry and overall infection by AAK1, GAK and their pharmacological inhibitors.** (A, B) Quantification of rVSV-GP EBOV entry measured in Vero cells at 3 hours post-infection by real-time PCR following knockdown of AAK1 and GAK (A) or inhibitor treatment (B). Plotted is expression of EBOV GP normalized to GAPDH. Shown are mean +/- s.d. (n=3) relative to NT (A) or DMSO (B) controls (two-tailed unpaired t-test). \*\*p<0.01, \*\*\*p<0.001 by 1-way ANOVA followed by Dunnett's multiple comparisons test. Shown are representative experiments from at least two conducted.

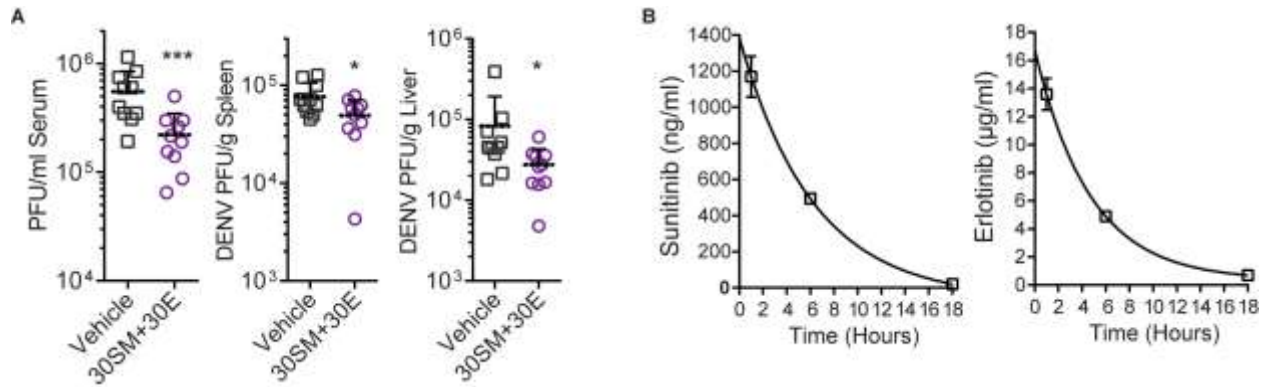

1242  
1243  
1244  
1245  
1246  
1247  
1248  
1249  
1250  
1251  
1252  
1253

**Supplemental figure 6. AAK1 and GAK inhibitors are protective in a dengue murine model.** (A) Effect of sunitinib (SM) and erlotinib (E) on viral load in serum, spleen and liver on day 3 post-infection of AG-B6 mice measured by plaque assays. Drugs were administered intraperitoneally once daily. Doses are in mg/kg. \*p<0.05, \*\*\*p<0.001 (nonparametric Mann-Whitney test). Experiments were replicated twice. (B) Quantification of drug serum levels in AG-B6 mice by liquid chromatography-tandem mass spectrometry following intraperitoneal administration of a single dose of 30 mg/kg sunitinib and 30 mg/kg erlotinib (n=2). Analysis was performed by Integrated Analytical Solutions (Berkeley, Ca). Shown are representative experiments from at least two conducted.

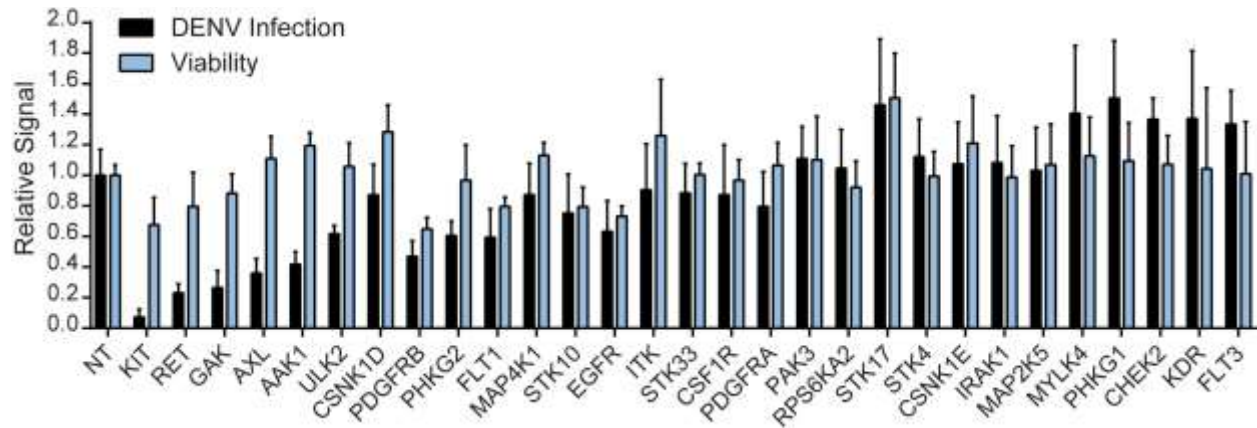

1254  
1255

1256

**Supplemental figure 7. siRNA screen testing the involvement of kinases inhibited by sunitinib and erlotinib in DENV infection.** Overall DENV infection (black) measured by luciferase assays and relative cell viability (blue) measured by alamarBlue assays at 48 hours post-infection of siRNA-transfected Huh7 cells. Data are expressed relative to NT siRNA. Data are an average of two independent screens with 8 replicates each.

1259

1260

1261

1262

1263

1264

1265

1266

1267

1268

1269

1270

1271

1272

1273

1274

1275

1276

1277

1278

1279

1280

1281

1282

1283

1284

1285  
1286  
1287

**Supplemental Table 1. siRNA library against top 27 kinase targets of sunitinib and erlotinib.**

| Pool Catalog # | Duplex Catalog # | Gene Symbol | GENE ID | Gene Accession | Sequence             |
|----------------|------------------|-------------|---------|----------------|----------------------|
| L-003150-00    | J-003150-09      | KIT         | 3815    | NM_000222      | UAAAGGAAACGCUCGACUA  |
| L-003150-00    | J-003150-10      | KIT         | 3815    | NM_000222      | AAACACGGCUUAAGCAAUU  |
| L-003150-00    | J-003150-11      | KIT         | 3815    | NM_000222      | AACAGAACCUUCACUGAUA  |
| L-003150-00    | J-003150-12      | KIT         | 3815    | NM_000222      | GUUCAAGCAGGAAGAUA    |
| L-003137-00    | J-003137-09      | FLT3        | 2322    | NM_004119      | CAAGAAACGACACCGGAUA  |
| L-003137-00    | J-003137-10      | FLT3        | 2322    | NM_004119      | GAAUUUAAGUCGUGUGUUC  |
| L-003137-00    | J-003137-11      | FLT3        | 2322    | NM_004119      | GCA AUGAUUUUUGGGACUA |
| L-003137-00    | J-003137-12      | FLT3        | 2322    | NM_004119      | CGCAACAGCUUAUGGAAUU  |
| L-003966-00    | J-003966-12      | MAP2K5      | 5607    | NM_145162      | CCUCCAUAUGCUAGUAAA   |
| L-003966-00    | J-003966-13      | MAP2K5      | 5607    | NM_145162      | UAAGUGCGAUUCAUAUU    |
| L-003966-00    | J-003966-14      | MAP2K5      | 5607    | NM_145162      | GGAGCCAUUUUGUACAUUUC |
| L-003966-00    | J-003966-15      | MAP2K5      | 5607    | NM_145162      | GAAUUGCAGUAGCAGUUGU  |
| L-003148-00    | J-003148-09      | KDR         | 3791    | NM_002253      | GGGCAUGUACUGACGAUUA  |
| L-003148-00    | J-003148-10      | KDR         | 3791    | NM_002253      | CUACAUUGUUCUUCGGAUA  |
| L-003148-00    | J-003148-11      | KDR         | 3791    | NM_002253      | GGAAUCUCUUGCAAGCUA   |
| L-003148-00    | J-003148-12      | KDR         | 3791    | NM_002253      | GCGAUGCCUCUUCUGUAA   |
| L-003162-00    | J-003162-11      | PDGFRA      | 5156    | NM_006206      | CGAGACUCCUGUAACCUUA  |
| L-003162-00    | J-003162-12      | PDGFRA      | 5156    | NM_006206      | GAGCUUCACCUAUCAGUU   |
| L-003162-00    | J-003162-13      | PDGFRA      | 5156    | NM_006206      | GACAGUGCCAUUAUACUA   |
| L-003162-00    | J-003162-14      | PDGFRA      | 5156    | NM_006206      | GAAUAGGGAUAGCUUCCUG  |
| L-003163-00    | J-003163-10      | PDGFRB      | 5159    | NM_002609      | CAACGAGUCUCCAGUGCUA  |
| L-003163-00    | J-003163-11      | PDGFRB      | 5159    | NM_002609      | GAGCGACGGUGGCUACAUG  |
| L-003163-00    | J-003163-12      | PDGFRB      | 5159    | NM_002609      | GAAGCCACGUUACGAGAUC  |
| L-003163-00    | J-003163-13      | PDGFRB      | 5159    | NM_002609      | GGUGGGCACACUACA AUUU |
| L-003114-00    | J-003114-10      | EGFR        | 1956    | NM_201283      | CAAAGUGUGUAACGGAAUA  |
| L-003114-00    | J-003114-11      | EGFR        | 1956    | NM_201283      | CCAUAUAUGCUACGAAUUA  |
| L-003114-00    | J-003114-12      | EGFR        | 1956    | NM_201283      | GUAACAAGCUCACGCAGUU  |
| L-003114-00    | J-003114-13      | EGFR        | 1956    | NM_201283      | CAGAGGAUGUCAAUAACU   |
| L-003136-00    | J-003136-10      | FLT1        | 2321    | NM_002019      | GCCGGAAGUUGUAUGGUUA  |
| L-003136-00    | J-003136-11      | FLT1        | 2321    | NM_002019      | UAGAAAGGGCUUCAUCAUA  |
| L-003136-00    | J-003136-12      | FLT1        | 2321    | NM_002019      | GUGGUCAGCUCUAGAAUUU  |
| L-003136-00    | J-003136-13      | FLT1        | 2321    | NM_002019      | GUCAUCCUCCGCCGGGUUA  |
| L-003109-00    | J-003109-10      | CSF1R       | 1436    | NM_005211      | GGAAGAUCAUCGAGAGCUA  |
| L-003109-00    | J-003109-11      | CSF1R       | 1436    | NM_005211      | GGUGAAGGAUGGAUACCAA  |
| L-003109-00    | J-003109-12      | CSF1R       | 1436    | NM_005211      | GUAACGUGCUGUUGACCAA  |
| L-003109-00    | J-003109-13      | CSF1R       | 1436    | NM_005211      | CCAGCAGCGUUGAUGUUAA  |
| L-005023-00    | J-005023-06      | PHKG1       | 5260    | NM_006213      | GCACAGGACUUCUAUGAGA  |
| L-005023-00    | J-005023-07      | PHKG1       | 5260    | NM_006213      | GCACUGCGUCAUCAUGUA   |
| L-005023-00    | J-005023-08      | PHKG1       | 5260    | NM_006213      | CCAGAAAGAUCAUGCGAGC  |
| L-005023-00    | J-005023-09      | PHKG1       | 5260    | NM_006213      | GAAGGACACUUAUGAGACC  |
| L-004881-00    | J-004881-13      | PHKG2       | 5261    | NM_000294      | GAUCCGACUUCAGAUUUC   |
| L-004881-00    | J-004881-14      | PHKG2       | 5261    | NM_000294      | CUACGAGUCUUCUAGCUUC  |
| L-004881-00    | J-004881-15      | PHKG2       | 5261    | NM_000294      | GGGAGACUCUGCUGCUAUA  |
| L-004881-00    | J-004881-16      | PHKG2       | 5261    | NM_000294      | CGAGAAGCUUCGAGAGUUG  |
| L-003104-00    | J-003104-10      | AXL         | 558     | NM_001699      | ACAGCGAGAUUUUAUGACUA |
| L-003104-00    | J-003104-11      | AXL         | 558     | NM_001699      | GGUACCGGCUGGCGUAUCA  |
| L-003104-00    | J-003104-12      | AXL         | 558     | NM_001699      | GACGAAUCCUCUAUGUCA   |
| L-003104-00    | J-003104-13      | AXL         | 558     | NM_001699      | GAAGGAGACCCGUUAUGGA  |
| L-003256-00    | J-003256-17      | CHEK2       | 11200   | NM_145862      | GUAAGAAGUAGCCAUAAA   |
| L-003256-00    | J-003256-18      | CHEK2       | 11200   | NM_145862      | GCAUAGGACUCAAGUGUCA  |
| L-003256-00    | J-003256-19      | CHEK2       | 11200   | NM_145862      | GUUGUGAACUCCGUGGUUU  |
| L-003256-00    | J-003256-20      | CHEK2       | 11200   | NM_145862      | CUCAGGAACUCUAUUCUUAU |
| L-005377-00    | J-005377-05      | STK17A      | 9263    | NM_004760      | UUUAGAAGGUGUUCACUUU  |

|             |             |         |        |              |                      |
|-------------|-------------|---------|--------|--------------|----------------------|
| L-005377-00 | J-005377-06 | STK17A  | 9263   | NM_004760    | UAACAUUUGUCAUGCUUAC  |
| L-005377-00 | J-005377-07 | STK17A  | 9263   | NM_004760    | GAAUAUCACCUUUCUUAGG  |
| L-005377-00 | J-005377-08 | STK17A  | 9263   | NM_004760    | CAUAUACUCUJAGGACAAUG |
| L-004168-00 | J-004168-09 | STK10   | 6793   | NM_005990    | GAGCAAUUGCAUAAACGUU  |
| L-004168-00 | J-004168-10 | STK10   | 6793   | NM_005990    | GAUCAUGAUUGAGUUCUGU  |
| L-004168-00 | J-004168-11 | STK10   | 6793   | NM_005990    | CAAGCGGACACGCAAUUU   |
| L-004168-00 | J-004168-12 | STK10   | 6793   | NM_005990    | GGAGAACCAUACUCAGAAC  |
| L-003478-01 | J-003478-17 | CSNK1D  | 1453   | NM_001893    | ACGAAAGGAUUAGCGAGAA  |
| L-003478-01 | J-003478-18 | CSNK1D  | 1453   | NM_001893    | CGACCUCACAGGCCGACAA  |
| L-003478-01 | J-003478-19 | CSNK1D  | 1453   | NM_001893    | GCCAAGAAGUACCGGGAUG  |
| L-003478-01 | J-003478-20 | CSNK1D  | 1453   | NM_001893    | AGGCUACCCUCCGAAUUU   |
| L-003479-00 | J-003479-10 | CSNK1E  | 1454   | NM_001894    | CCACCAAGCGCCAGAAGUA  |
| L-003479-00 | J-003479-11 | CSNK1E  | 1454   | NM_001894    | CCUCCGAAUUCUCAACAU   |
| L-003479-00 | J-003479-12 | CSNK1E  | 1454   | NM_001894    | CGACUACUCUUACCUACGU  |
| L-003479-00 | J-003479-13 | CSNK1E  | 1454   | NM_001894    | GAUCAGCCGCAUCGAGUAU  |
| L-003586-00 | J-003586-07 | MAP4K1  | 11184  | NM_007181    | GAUACAUGAGCUGUGUGA   |
| L-003586-00 | J-003586-08 | MAP4K1  | 11184  | NM_007181    | CAACAACGUUCUCAUGUCU  |
| L-003586-00 | J-003586-09 | MAP4K1  | 11184  | NM_007181    | GGAGUUAUCUCUGGUUGCA  |
| L-003586-00 | J-003586-10 | MAP4K1  | 11184  | NM_007181    | GAAAGGACCCUCCAUIGGG  |
| L-004760-00 | J-004760-12 | IRAK1   | 3654   | NM_001025243 | GAUGAGGGCUGACACCCA   |
| L-004760-00 | J-004760-13 | IRAK1   | 3654   | NM_001025243 | CGAAGAAAGUGAUGAAUUU  |
| L-004760-00 | J-004760-14 | IRAK1   | 3654   | NM_001025243 | GCAAUUCAGUUUCUACAUC  |
| L-004760-00 | J-004760-15 | IRAK1   | 3654   | NM_001025243 | GAGCUGAUGUGUUCACCG   |
| L-003144-00 | J-003144-13 | ITK     | 3702   | NM_005546    | AGACAUCAGUACCGGAUUU  |
| L-003144-00 | J-003144-14 | ITK     | 3702   | NM_005546    | ACAGUUUGGUGCCUAAAUA  |
| L-003144-00 | J-003144-15 | ITK     | 3702   | NM_005546    | UCAACUAUCACCAACAUAA  |
| L-003144-00 | J-003144-16 | ITK     | 3702   | NM_005546    | CCACACACGUCUACCAGAU  |
| L-004157-00 | J-004157-06 | STK4    | 6789   | NM_006282    | CCAGAGCUAUGGUCAGAU   |
| L-004157-00 | J-004157-07 | STK4    | 6789   | NM_006282    | GCCCUCAUGUAGUCAAAUA  |
| L-004157-00 | J-004157-08 | STK4    | 6789   | NM_006282    | GAUGGGCACUGUCCGAGUA  |
| L-004157-00 | J-004157-09 | STK4    | 6789   | NM_006282    | UAAAGAGACCGGCCAGAUU  |
| L-027171-01 | J-027171-13 | MYLK4   | 340156 | NM_001012418 | GAGAAGAGUUGGCCAAUAA  |
| L-027171-01 | J-027171-14 | MYLK4   | 340156 | NM_001012418 | CGGAAAGGAUGCCCGUCA   |
| L-027171-01 | J-027171-15 | MYLK4   | 340156 | NM_001012418 | GAAAUUAAGCACCGAUGUA  |
| L-027171-01 | J-027171-16 | MYLK4   | 340156 | NM_001012418 | GUGAAGGCCACAUGCGAAU  |
| L-003614-00 | J-003614-05 | PAK3    | 5063   | NM_002578    | CAAAGUAAACGAAGCACUA  |
| L-003614-00 | J-003614-06 | PAK3    | 5063   | NM_002578    | GGGCAUCAGGUACUGUUUA  |
| L-003614-00 | J-003614-07 | PAK3    | 5063   | NM_002578    | GAGAGACUGUCAGCUGUAU  |
| L-003614-00 | J-003614-08 | PAK3    | 5063   | NM_002578    | GCAUUGGGCACGAUUACUC  |
| L-003170-00 | J-003170-09 | RET     | 5979   | NM_020630    | CAGGAGGGCUCGCCGAUUU  |
| L-003170-00 | J-003170-10 | RET     | 5979   | NM_020630    | AGAGACGGCUGGAGUGUGA  |
| L-003170-00 | J-003170-11 | RET     | 5979   | NM_020630    | GGGCGACCGUACAUGACUA  |
| L-003170-00 | J-003170-12 | RET     | 5979   | NM_020630    | GUCCCGAGAUGUUUAUGAA  |
| L-004663-00 | J-004663-06 | RPS6KA2 | 6196   | NM_001006932 | CAAGCGAUGUGUGCAUAAA  |
| L-004663-00 | J-004663-07 | RPS6KA2 | 6196   | NM_001006932 | UAAUGGAGCUGAUGCGUGG  |
| L-004663-00 | J-004663-08 | RPS6KA2 | 6196   | NM_001006932 | GGAACACGCUGUACCGGAA  |
| L-004663-00 | J-004663-09 | RPS6KA2 | 6196   | NM_001006932 | GCAAUUGGGCCAGACGAUA  |
| L-005383-00 | J-005383-07 | STK33   | 65975  | NM_030906    | GAGCAUAGGCGUCGUAAUG  |
| L-005383-00 | J-005383-08 | STK33   | 65975  | NM_030906    | GCUGAUAGUGGCUUAGAUA  |
| L-005383-00 | J-005383-09 | STK33   | 65975  | NM_030906    | CGAUCAGCUAUAGCAUUA   |
| L-005383-00 | J-005383-10 | STK33   | 65975  | NM_030906    | GAAGCAAAGUAGGAGUGAA  |
| L-005396-00 | J-005396-06 | ULK2    | 9706   | NM_014683    | GUGGAGACCUCGCAGAUUA  |
| L-005396-00 | J-005396-07 | ULK2    | 9706   | NM_014683    | UCAGACCACUCAUGUGAUA  |
| L-005396-00 | J-005396-08 | ULK2    | 9706   | NM_014683    | CGAUUAAAUUCUGCAUCA   |
| L-005396-00 | J-005396-09 | ULK2    | 9706   | NM_014683    | UCCAAGAUCUGCAGUGGUA  |
| L-005300-02 | J-005300-05 | AAK1    | 22848  | NM_014911    | CCUCGGACCUCUCAACAAA  |
| L-005300-02 | J-005300-07 | AAK1    | 22848  | NM_014911    | ACAAAAGGCCGGAUUAUUU  |
| L-005300-02 | J-005300-08 | AAK1    | 22848  | NM_014911    | GGAAGGUGGAUUUGCUAUU  |
| L-005300-02 | J-005300-17 | AAK1    | 22848  | NM_014911    | GCGUAUUCUCAGUGACGUA  |

|             |             |            |     |     |                     |
|-------------|-------------|------------|-----|-----|---------------------|
| D-001810-10 | D-001810-01 | NT Control | N/A | N/A | UGGUUUACAUGUCGACUAA |
| D-001810-10 | D-001810-02 | NT Control | N/A | N/A | UGGUUUACAUGUUGUGUGA |
| D-001810-10 | D-001810-03 | NT Control | N/A | N/A | UGGUUUACAUGUUUUCUGA |
| D-001810-10 | D-001810-04 | NT Control | N/A | N/A | UGGUUUACAUGUUUCCUA  |

1288  
1289  
1290  
1291  
1292  
1293  
1294  
1295  
1296  
1297  
1298  
1299  
1300  
1301  
1302  
1303  
1304  
1305  
1306  
1307  
1308  
1309  
1310  
1311  
1312  
1313  
1314  
1315  
1316  
1317  
1318  
1319  
1320  
1321  
1322  
1323  
1324  
1325  
1326  
1327  
1328

## Supplemental Videos

**Supplemental Video 1.** Co-trafficking of TC-core HCV with AP1. Representative video. TC-core (green), AP1 (red).

**Supplemental Video 2.** Co-trafficking of TC-core HCV with AP2. Representative video. TC-core (green), AP2 (red).

**Supplemental Video 3.** Co-trafficking of TC-core HCV with LC3. Representative video. TC-core (red), LC (green).

**Supplemental Video 4.** Co-trafficking of TC-core Y136A HCV with AP2. Representative video. Mutant TC-core (green), AP2 (red).

**Supplemental Video 5.** Co-trafficking of TC-core HCV with AP1 upon vehicle treatment. Representative video. TC-core (green), AP1 (red).

**Supplemental Video 6.** Co-trafficking of TC-core HCV with AP1 upon sunitinib treatment. Representative video. TC-core (green), AP1 (red).

**Supplemental Video 7.** Co-trafficking of TC-core HCV with AP1 upon sunitinib treatment. Representative video. TC-core (green), AP1 (red).

**Supplemental Video 8.** Co-trafficking of TC-core HCV with AP2 upon vehicle treatment. Representative video. TC-core (green), AP2 (red).

**Supplemental Video 9.** Co-trafficking of TC-core HCV with AP2 upon sunitinib treatment. Representative video. TC-core (green), AP2 (red).

**Supplemental Video 10.** Co-trafficking of TC-core HCV with AP2 upon erlotinib treatment. Representative video. TC-core (green), AP2 (red).

Full uncut gel for Figure 1A

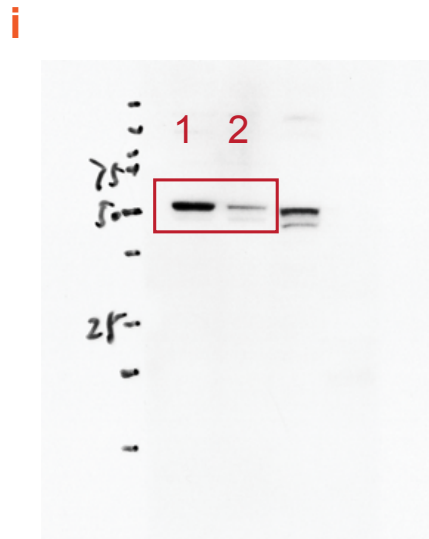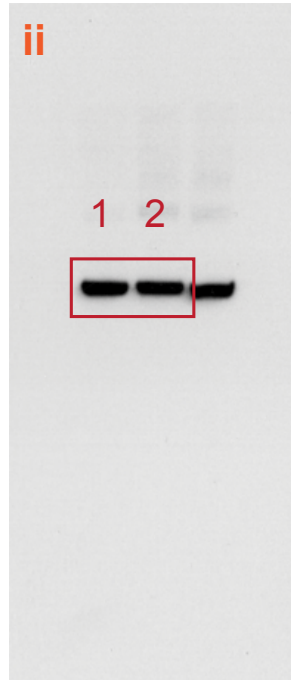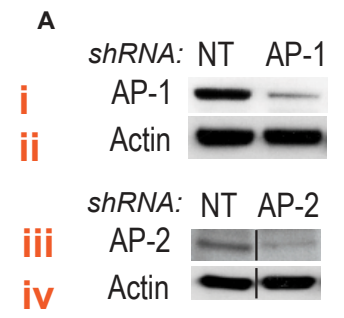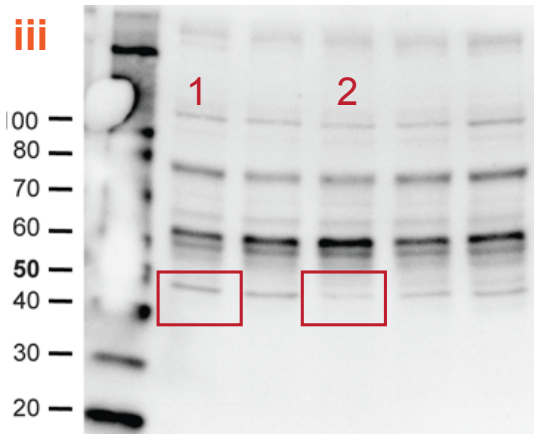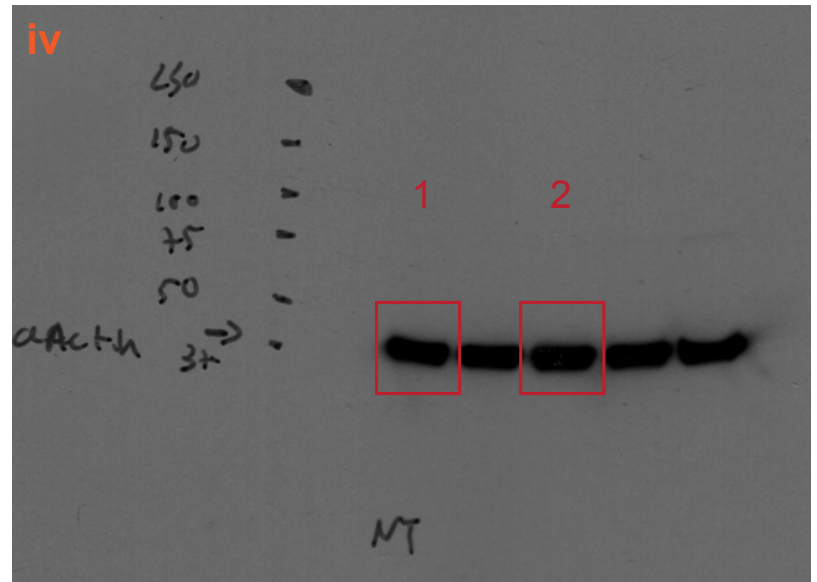



# Full uncut gel for Figure 1E

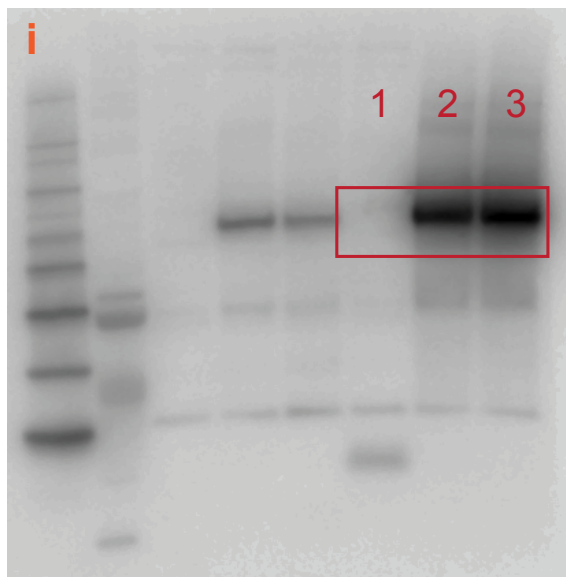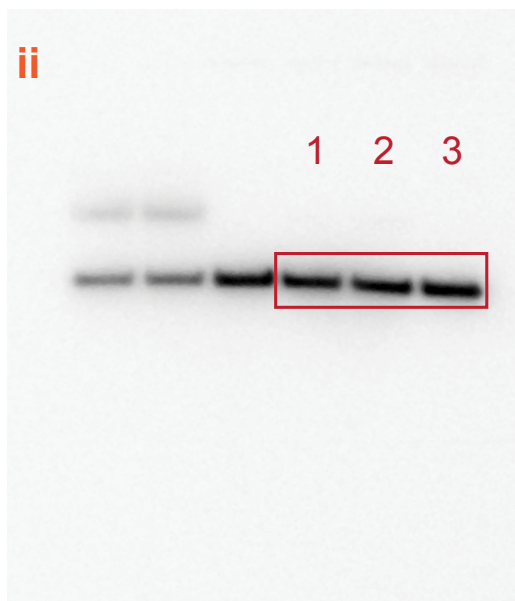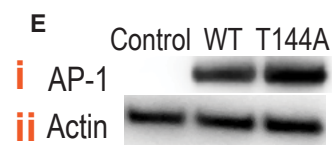

Full uncut gel for Figure 2A

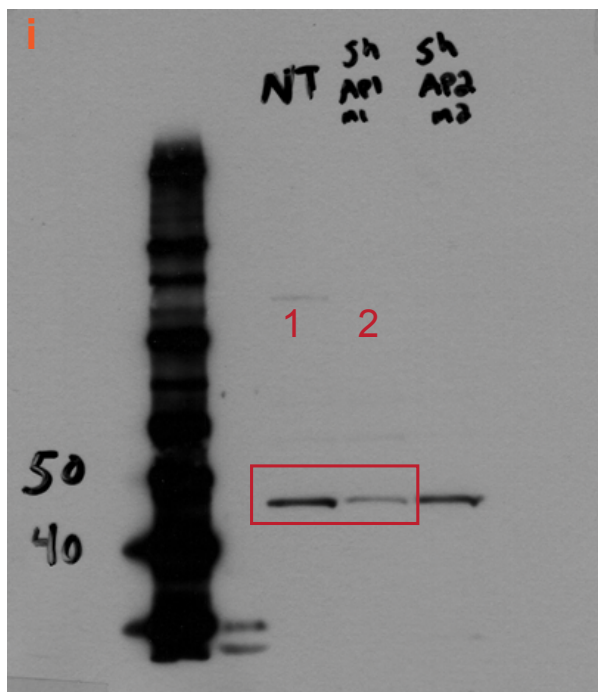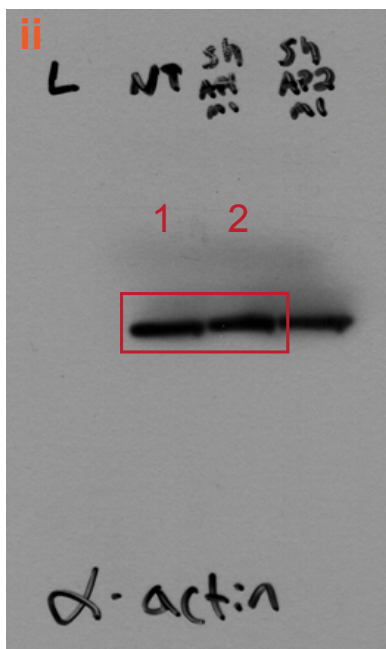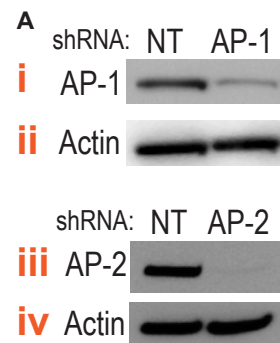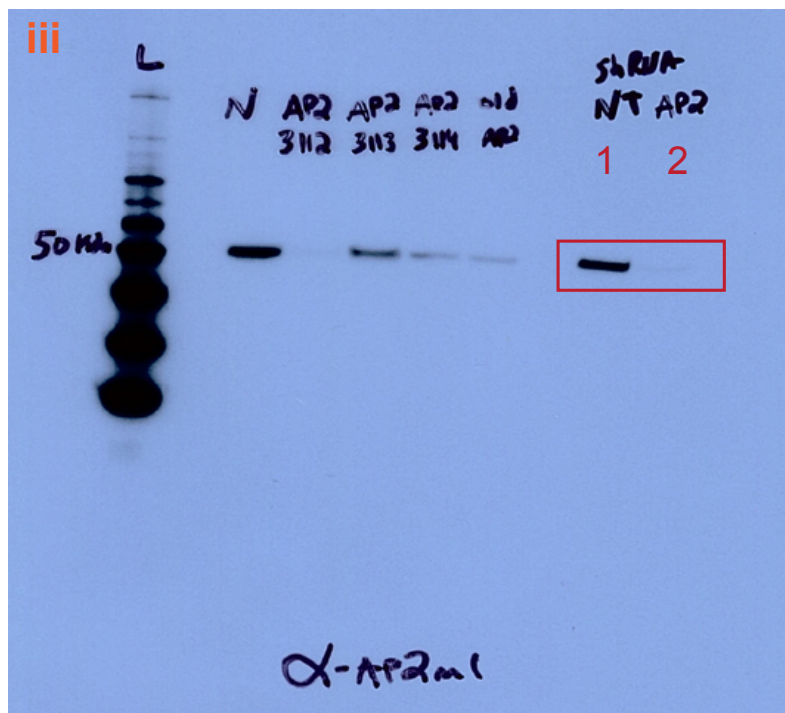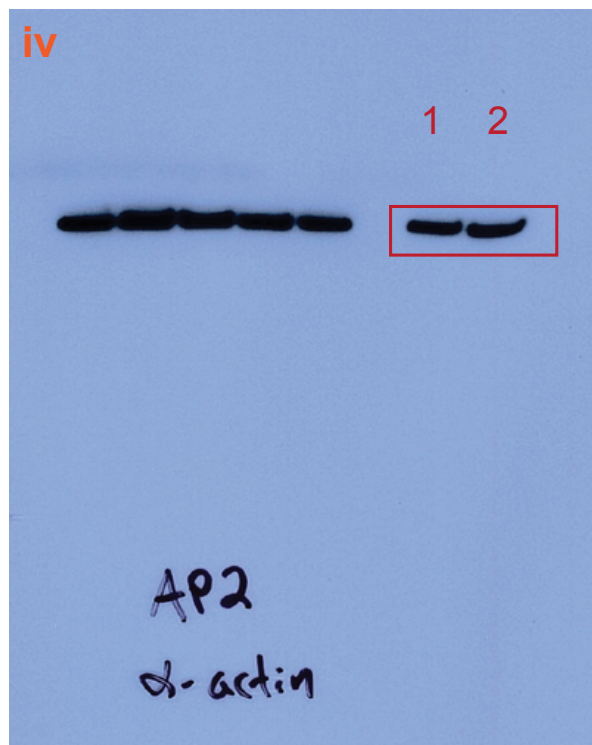

Full uncut gel for Figure 2E

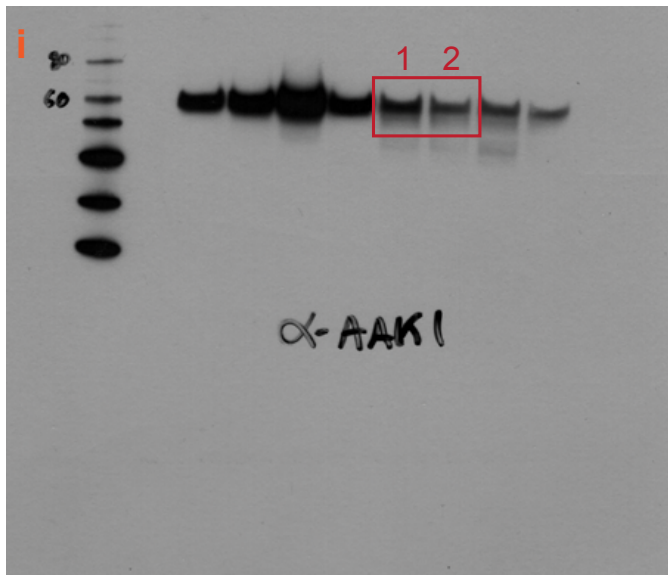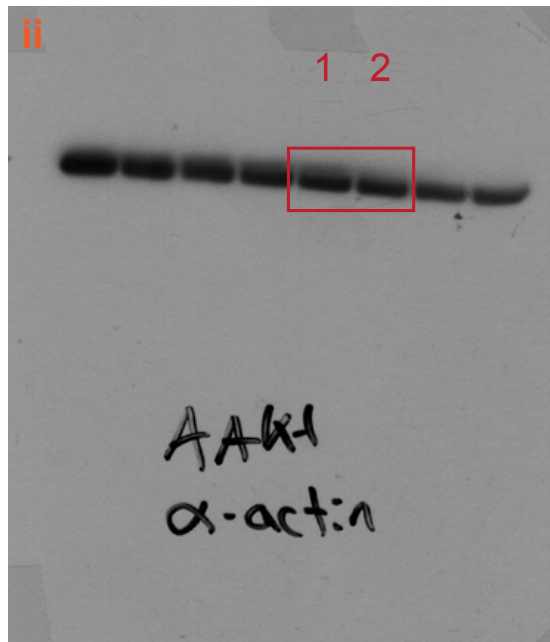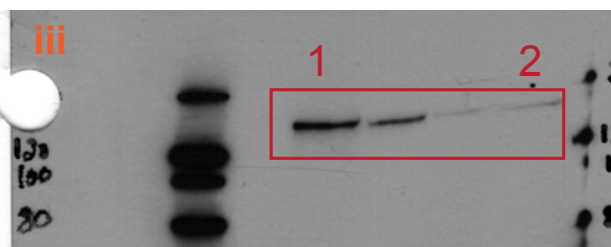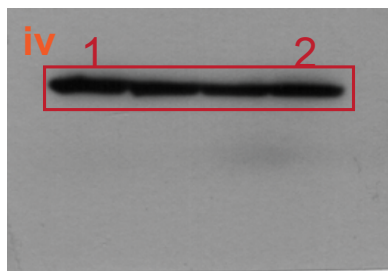

**E**  
siRNA: NT AAK1

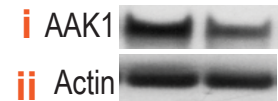

siRNA: NT GAK

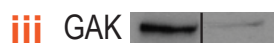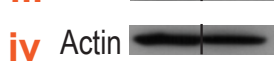

# Full uncut gel for Figure 6D

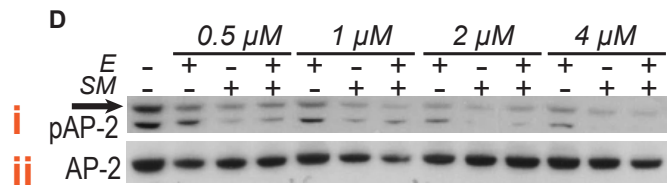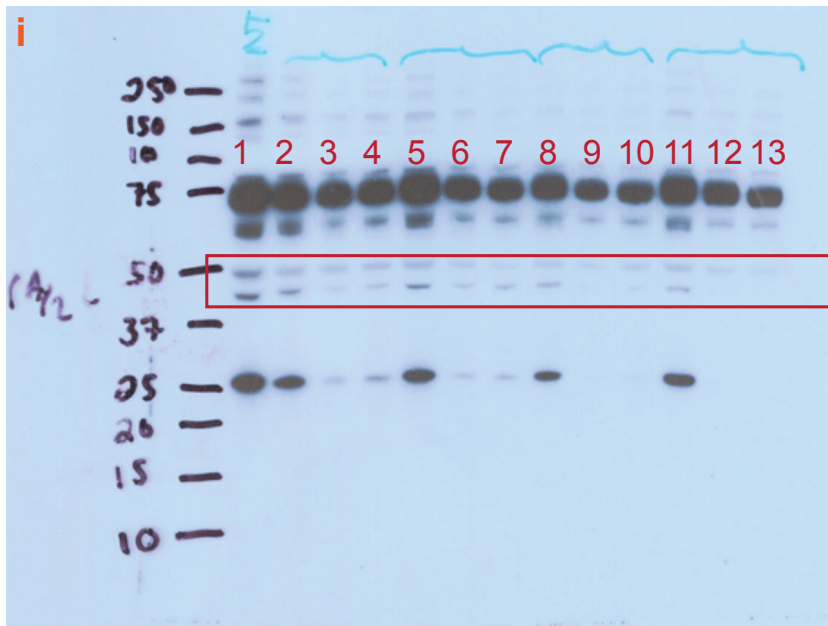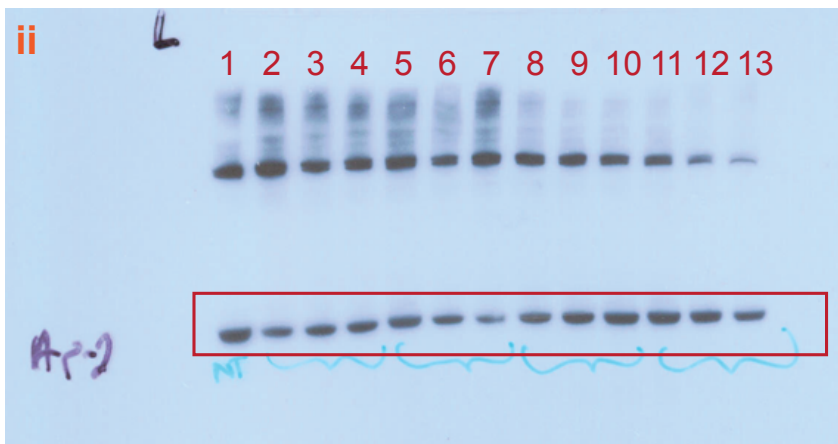

# Full uncut gel for Figure 6E

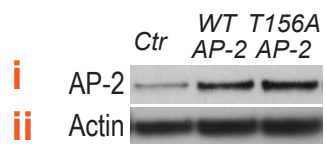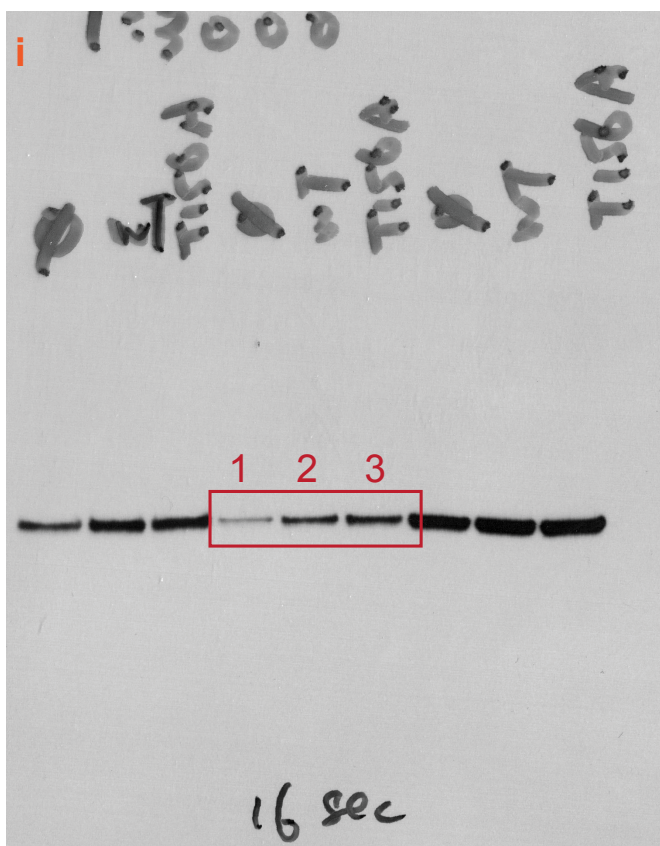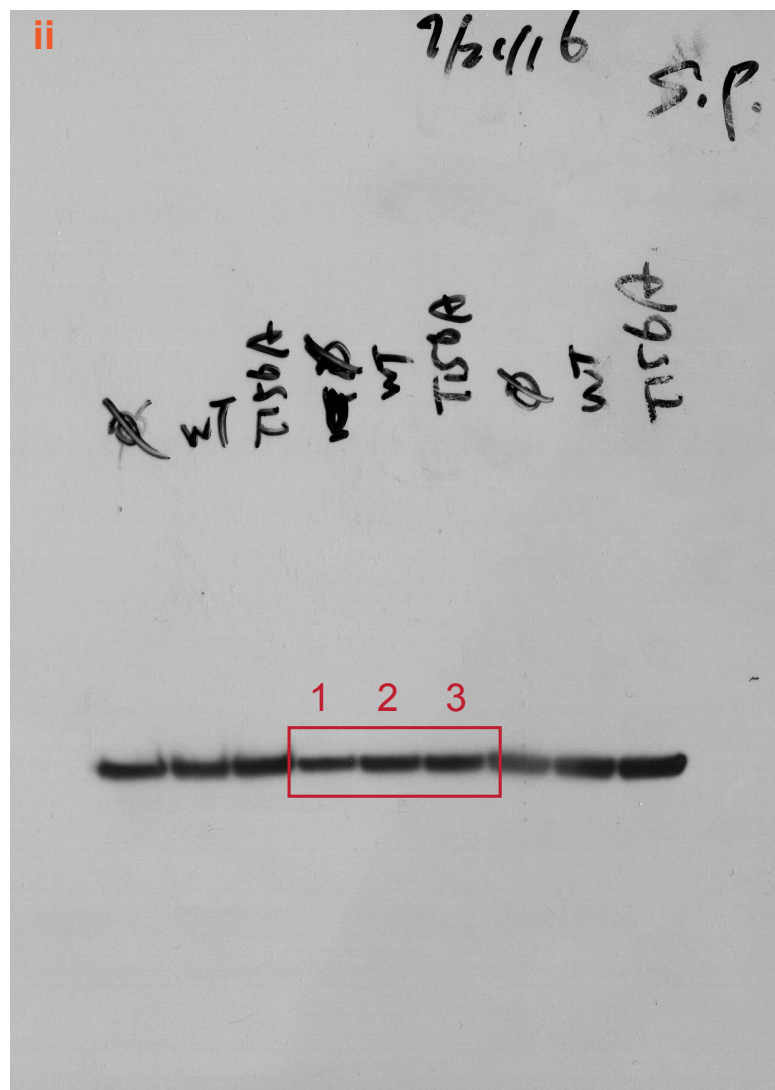

# Full uncut gel for Figure 6G

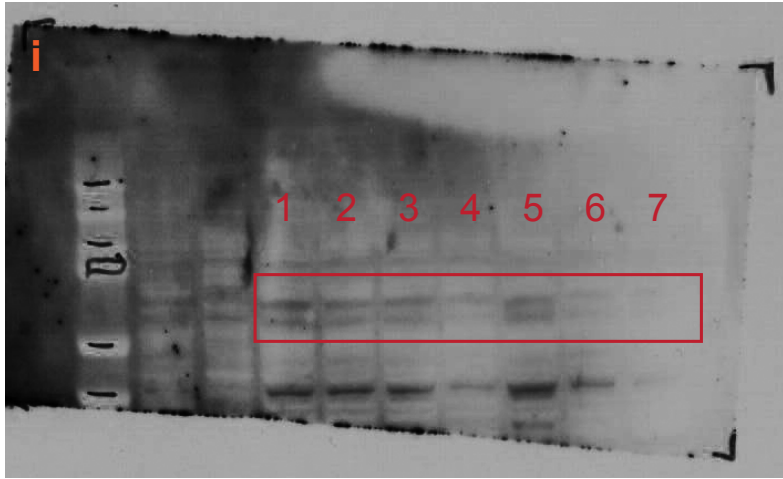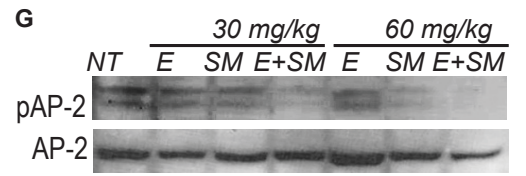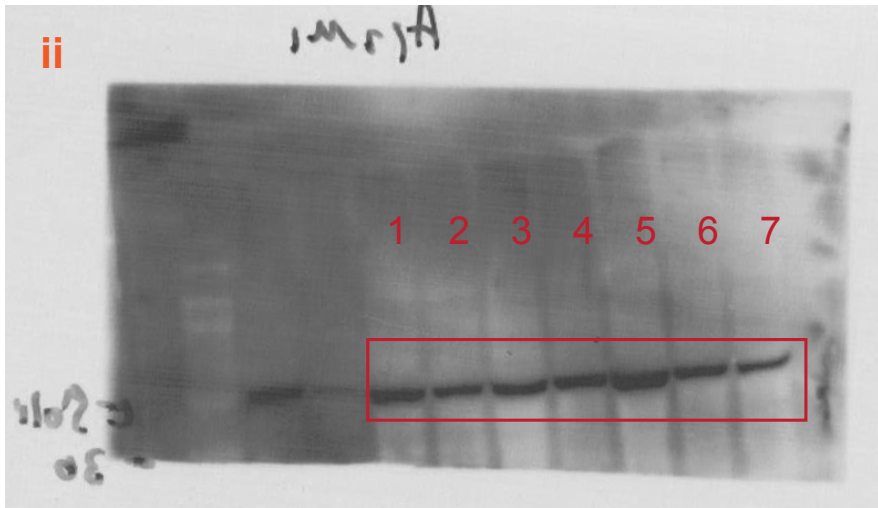

Supplement: jci-127-89857-s001.pdf [file jci-127-89857-s001.pdf]
